# Supplementary material for: Evaluation of the reactogenicity, adjuvanticity and antigenicity of LT(R192G) and LT(R192G/L211A) by intradermal immunization in mice
Source: PubMed Central journal article supplement (PMC6827915; doi:10.1371/journal.pone.0224073), 2019-11-04
Supplement: pone.0224073.s001.pdf [file pone.0224073.s001.pdf]

Fig. 2C

| Animal #/Study day | 10ug dscCfaEB + 2500ng LTR192G |      |      |      |      | 10ug dscCfaEB + 500ng LTR192G |      |      |      |      | 10ug dscCfaEB + 100ng LTR192G |      |    |      |      | 10ug dscCfaEB + 50ng LTR192G |      |    |      |      | 10ug dscCfaEB + 10ng LTR192G |      |      |      |      | 10ug dscCfaEB + 2500ng dmLT |      |      |      |      | 10ug dscCfaEB + 500ng dmLT |    |    |    |    | 10ug dscCfaEB + 100ng dmLT |      |      |      |      | 10ug dscCfaEB + 50ng dmLT |      |      |      |      | 10ug dscCfaEB + 10ng dmLT |      |      |      |      | Saline |      |      |      |      |      |      |    |    |    |    |    |    |    |    |    |    |    |    |    |   |   |   |   |   |  |   |   |   |   |   |  |   |   |   |   |   |  |
|--------------------|--------------------------------|------|------|------|------|-------------------------------|------|------|------|------|-------------------------------|------|----|------|------|------------------------------|------|----|------|------|------------------------------|------|------|------|------|-----------------------------|------|------|------|------|----------------------------|----|----|----|----|----------------------------|------|------|------|------|---------------------------|------|------|------|------|---------------------------|------|------|------|------|--------|------|------|------|------|------|------|----|----|----|----|----|----|----|----|----|----|----|----|----|---|---|---|---|---|--|---|---|---|---|---|--|---|---|---|---|---|--|
|                    | #1                             | #2   | #3   | #4   | #5   | #6                            | #7   | #1   | #2   | #3   | #4                            | #5   | #6 | #7   | #1   | #2                           | #3   | #4 | #5   | #6   | #7                           | #1   | #2   | #3   | #4   | #5                          | #6   | #7   | #1   | #2   | #3                         | #4 | #5 | #6 | #7 | #1                         | #2   | #3   | #4   | #5   | #6                        | #7   | #1   | #2   | #3   | #4                        | #5   | #6   | #7   | #1   | #2     | #3   | #4   | #5   | #6   | #7   | #1   | #2 | #3 | #4 | #5 | #6 | #7 | #1 | #2 | #3 | #4 | #5 | #6 | #7 |   |   |   |   |   |  |   |   |   |   |   |  |   |   |   |   |   |  |
| 29                 | 12.5                           | 11.9 | 10.3 | 13   | 12.8 |                               | 10.4 | 9.32 | 10   | 4.8  | 9.42                          | 8.68 |    | 13.7 | 8.75 | 8.33                         | 8.28 |    | 7.21 | 6.86 | 7.31                         | 7.4  | 7.4  | 8.36 | 7.05 | 7.4                         | 7.95 | 6.1  | 9.47 | 10.2 | 10.7                       |    |    |    |    | 9.1                        | 8.66 | 7.97 | 8.01 | 3.77 | 8.62                      | 8.52 | 7.73 | 9.2  | 7.67 | 8.46                      | 7.1  | 6.97 | 7.95 | 7.5  | 7.71   | 7.4  | 5.29 | 4.52 | 5.25 | 4.88 | 7.55 |    |    |    |    |    |    | 0  | 0  | 0  | 0  | 0  | 0  |    | 0 | 0 | 0 | 0 | 0 |  | 0 | 0 | 0 | 0 | 0 |  | 0 | 0 | 0 | 0 | 0 |  |
| 30                 | 7.44                           | 8.11 | 6.23 | 7.88 | 8.32 |                               | 8.57 | 6.2  | 7.05 | 5.11 | 7.34                          | 5.88 |    | 5.77 | 5.28 | 5.31                         | 4.6  |    | 4.29 | 4.56 | 4.26                         | 4.53 | 5.16 | 4.48 | 5.42 | 5.36                        | 4.67 | 4.72 | 7.26 | 7.44 | 9.61                       |    |    |    |    | 7.93                       | 7.52 | 5.35 | 5.57 | 7.12 | 7.06                      | 6.48 | 5.1  | 6.01 | 5.15 | 5.61                      | 5.6  | 4.26 | 4.61 | 4.71 | 5.06   | 4.86 | 0    | 3.67 | 4.34 | 0    | 4.29 |    |    |    |    |    |    | 0  | 0  | 0  | 0  | 0  | 0  |    | 0 | 0 | 0 | 0 | 0 |  | 0 | 0 | 0 | 0 | 0 |  | 0 | 0 | 0 | 0 | 0 |  |
| 31                 | 6.2                            | 5.84 | 5.61 | 6.17 | 5.86 |                               | 5.31 | 0    | 5.42 | 4.55 | 4.51                          | 4.23 |    | 3.9  | 4.18 | 4.46                         | 4.36 |    | 4.69 | 3.84 | 3.54                         | 3.55 | 3.6  | 3.73 | 3.69 | 4.17                        | 0    | 3.46 | 6.04 | 6.63 | 7.24                       |    |    |    |    | 4.51                       | 6.76 | 4.58 | 4.55 | 5.61 | 5.09                      | 5.26 | 3.99 | 4.93 | 4.31 | 4.38                      | 4.46 | 0    | 4.55 | 4.69 | 4.27   | 0    | 0    | 0    | 3.33 | 0    | 3.48 |    |    |    |    |    |    | 0  | 0  | 0  | 0  | 0  | 0  |    | 0 | 0 | 0 | 0 | 0 |  | 0 | 0 | 0 | 0 | 0 |  |   |   |   |   |   |  |
| 35                 | 4.53                           | 0    | 0    | 5.03 | 0    |                               | 4.06 | 0    | 4.21 | 0    | 3.61                          | 0    |    | 0    | 0    | 0                            | 4.33 |    | 0    | 0    | 0                            | 0    | 0    | 0    | 0    | 0                           | 0    | 0    | 0    | 4.69 | 4.81                       |    |    |    |    | 0                          | 0    | 0    | 0    | 0    | 3.27                      | 2.86 | 3.1  | 0    | 0    | 0                         | 0    |      |      |      |        | 0    | 0    | 0    | 0    | 0    | 0    |    | 0  | 0  | 0  | 0  | 0  |    | 0  | 0  | 0  | 0  | 0  |    |   |   |   |   |   |  |   |   |   |   |   |  |   |   |   |   |   |  |
| 42                 | 0                              | 0    | 0    | 0    | 0    |                               | 0    | 0    | 0    | 0    | 0                             | 0    |    | 0    | 0    | 0                            | 0    | 0  |      | 0    | 0                            | 0    | 0    | 0    | 0    | 0                           | 0    | 0    | 0    | 0    | 0                          | 0  | 0  | 0  | 0  | 0                          | 0    | 0    | 0    | 0    | 0                         | 0    | 0    | 0    | 0    | 0                         | 0    | 0    |      |      |        |      | 0    | 0    | 0    | 0    | 0    | 0  |    | 0  | 0  | 0  | 0  | 0  |    | 0  | 0  | 0  | 0  | 0  |   |   |   |   |   |  |   |   |   |   |   |  |   |   |   |   |   |  |

Fig. 2D

| Dose and Site/Animal ID | mLT     |         |         |        |        |        |        |        |        |        |       |       |       |       |       | dmLT      |           |           |         |         |         |         |         |         |         |         |         |         |         |         |
|-------------------------|---------|---------|---------|--------|--------|--------|--------|--------|--------|--------|-------|-------|-------|-------|-------|-----------|-----------|-----------|---------|---------|---------|---------|---------|---------|---------|---------|---------|---------|---------|---------|
|                         | 2500 S1 | 2500 S2 | 2500 S3 | 500 S1 | 500 S2 | 500 S3 | 100 S1 | 100 S2 | 100 S3 | 50 S1  | 50 S2 | 50 S3 | 10 S1 | 10 S2 | 10 S3 | d 2500 S1 | d 2500 S2 | d 2500 S3 | d 500S1 | d 500S2 | d 500S3 | d 100S1 | d 100S2 | d 100S3 | d 50 S1 | d 50 S2 | d 50 S3 | d 10 S1 | d 10 S2 | d 10 S3 |
| <b>1</b>                | 17.035  | 15.715  | 12.45   | 12.85  | 11.99  | 10.435 | 7.79   | 8.15   | 8.68   | 7.83   | 7.72  |       | 5.975 | 7.405 | 8.36  | 19.83     | 11.35     | 9.47      | 16.82   | 7.475   | 7.965   | 6.735   | 7.905   |         | 7.155   | 4.96    |         | 4.375   | 4.77    | 5.29    |
| <b>2</b>                | 18.62   | 15.785  |         | 14.08  | 15.065 | 9.315  | 9.42   | 9.7    |        | 6.9735 | 6.64  | 7.205 | 7.04  | 7.645 | 7.045 | 18.46     | 13.385    | 10.235    | 15.98   | 7.54    | 8.01    | 6.11    | 8.725   | 7.73    | 6.975   | 5.515   |         | 3.73    | 5.885   | 4.52    |
| <b>3</b>                | 17.795  | 19.025  | 11.86   | 16.315 | 13.36  |        | 7.955  | 10.055 |        | 5.91   | 7.06  |       | 6.545 | 6.995 | 7.395 | 20.835    | 11.355    | 10.745    | 16.455  | 8.53    | 7.115   | 8.64    | 8.04    | 9.195   | 4.405   | 6.73    | 6.97    | 4.815   | 4.975   |         |
| <b>4</b>                | 17.77   | 14.895  | 10.29   | 13.07  | 11.51  | 10.005 | 7.9    | 9.065  | 13.69  | 7.14   | 5.91  | 6.855 | 5.735 | 5.965 |       | 15.815    | 12.06     |           | 11.69   | 7.655   |         | 7.74    | 6.85    |         | 6.085   | 6.79    | 7.95    | 0       | 6.215   | 5.245   |
| <b>5</b>                | 19.16   | 18.435  | 13.025  | 13.525 | 12.785 | 5.105  | 8.78   | 9.41   | 8.75   | 8.495  | 8.94  | 7.305 | 6.945 | 6.525 | 7.945 | 16.98     | 14.3      |           | 16.03   | 8.34    |         | 9.21    | 7.59    | 7.665   | 6.695   | 6.12    | 7.495   | 0       | 6.89    | 4.88    |
| <b>6</b>                | 15.105  | 15.315  | 12.765  | 14.885 | 14.97  | 9.415  | 9.015  | 10.735 | 8.325  | 7.725  | 8.68  | 7.395 | 6.52  | 7.555 |       | 19.07     | 16.705    | 9.1       | 16.12   | 8.995   | 8.62    | 7.72    | 6.64    | 8.46    | 6.06    | 6.98    | 7.71    | 6.74    | 6.225   | 7.55    |
| <b>7</b>                | 16.675  | 20.225  |         | 10.725 | 11.44  |        | 8.79   | 12.265 | 8.28   | 5.585  | 7.26  | 7.4   | 5.88  | 5.6   | 6.095 | 17.6      | 12.51     | 8.655     | 16.085  | 8.225   | 8.52    | 8.55    | 7.435   | 7.1     | 6.11    | 6.89    | 7.395   | 0       | 5.925   |         |

Fig. 4A

| Study day/Animal # | Group 1 |      |     |      |      | Group 2 |      |      |      |      | Group 3 |      |      |      |      | Group 4 |      |      |      |      | Group 5 |      |      |      |      | Group 6 |      |      |      |      | Group 7 |     |      |      |      | Group 8 |      |      |      |      | Group 9 |      |      |      |      | Group 10 |      |      |      |     | Group 11 |      |      |      |      | Group 12 |     |     |     |     |     |  |  |  |  |
|--------------------|---------|------|-----|------|------|---------|------|------|------|------|---------|------|------|------|------|---------|------|------|------|------|---------|------|------|------|------|---------|------|------|------|------|---------|-----|------|------|------|---------|------|------|------|------|---------|------|------|------|------|----------|------|------|------|-----|----------|------|------|------|------|----------|-----|-----|-----|-----|-----|--|--|--|--|
|                    | Pool/#1 | #2   | #3  | #4   | #5   | Pool/#1 | #2   | #3   | #4   | #5   | Pool/#1 | #2   | #3   | #4   | #5   | Pool/#1 | #2   | #3   | #4   | #5   | Pool/#1 | #2   | #3   | #4   | #5   | Pool/#1 | #2   | #3   | #4   | #5   | Pool/#1 | #2  | #3   | #4   | #5   | Pool/#1 | #2   | #3   | #4   | #5   | Pool/#1 | #2   | #3   | #4   | #5   | Pool/#1  | #2   | #3   | #4   | #5  |          |      |      |      |      |          |     |     |     |     |     |  |  |  |  |
| 0                  | 1.4     |      |     |      |      | 1.4     |      |      |      |      | 1.4     |      |      |      |      | 1.4     |      |      |      |      | 1.4     |      |      |      |      | 1.4     |      |      |      |      | 1.4     |     |      |      |      | 1.4     |      |      |      |      | 1.4     |      |      |      |      | 1.4      |      |      |      |     | 1.4      |      |      |      |      | 1.4      |     |     |     |     | 1.4 |  |  |  |  |
| 14                 | 3.65    |      |     |      |      | 3.07    |      |      |      |      | 2.78    |      |      |      |      | 2.66    |      |      |      |      | 3.16    |      |      |      |      | 3.27    |      |      |      |      | 3.31    |     |      |      |      | 3.14    |      |      |      |      | 3.39    |      |      |      |      | 3.22     |      |      |      |     | 2.03     |      |      |      |      | 1.4      |     |     |     |     | 1.4 |  |  |  |  |
| 28                 | 4.19    |      |     |      |      | 4.54    |      |      |      |      | 4.46    |      |      |      |      | 4.72    |      |      |      |      | 4.54    |      |      |      |      | 4.8     |      |      |      |      | 4.84    |     |      |      |      | 4.85    |      |      |      |      | 5.07    |      |      |      |      | 4.87     |      |      |      |     | 2.94     |      |      |      |      | 1.4      |     |     |     |     | 1.4 |  |  |  |  |
| 42                 | 4.44    | 4.34 | 4.3 | 4.69 | 4.71 | 4.71    | 5.08 | 5.01 | 5.09 | 4.86 | 4.19    | 4.41 | 4.64 | 4.39 | 5.12 | 4.72    | 4.93 | 4.73 | 5.15 | 5.26 | 4.7     | 4.46 | 4.99 | 5.27 | 5.25 | 4.88    | 4.77 | 4.84 | 4.93 | 5.02 | 4.92    | 5.1 | 4.98 | 4.92 | 5.54 | 4.72    | 4.77 | 4.57 | 4.98 | 5.32 | 5.53    | 5.33 | 5.36 | 5.33 | 5.35 | 5.5      | 4.69 | 5.51 | 5.35 | 4.9 | 2.2      | 3.18 | 4.04 | 2.59 | 3.01 | 1.4      | 1.4 | 1.4 | 1.4 | 1.4 |     |  |  |  |  |

**Groups ID**  
 Group 1 10 mcg CFAE + 0.01 mcg mL T  
 Group 2 10 mcg CFAE + 0.05 mcg mL T  
 Group 3 10 mcg CFAE + 0.1 mcg mL T  
 Group 4 10 mcg CFAE + 0.5 mcg mL T  
 Group 5 10 mcg CFAE + 2.5 mcg mL T  
 Group 6 10 mcg CFAE + 0.01 mcg dmLT  
 Group 7 10 mcg CFAE + 0.05 mcg dmLT  
 Group 8 10 mcg CFAE + 0.1 mcg dmLT  
 Group 9 10 mcg CFAE + 0.5 mcg dmLT  
 Group 10 10 mcg CFAE + 2.5 mcg dmLT  
 Group 11 10 mcg CFAE  
 Group 12 Saline

Fig. 4B

| Animal # | Group 1 | Group 2 | Group 3 | Group 4 | Group 5 | Group 6 | Group 7 | Group 8 | Group 9 | Group 10 | Group 11 | Group 12 |
|----------|---------|---------|---------|---------|---------|---------|---------|---------|---------|----------|----------|----------|
| 1        | 4.44    | 4.71    | 4.19    | 4.72    | 4.7     | 4.88    | 4.92    | 4.72    | 5.53    | 5.5      | 2.2      | 1.4      |
| 2        | 4.34    | 5.08    | 4.41    | 4.93    | 4.46    | 4.77    | 5.1     | 4.77    | 5.33    | 4.69     | 3.18     | 1.4      |
| 3        | 4.3     | 5.01    | 4.64    | 4.73    | 4.99    | 4.84    | 4.98    | 4.57    | 5.36    | 5.51     | 4.04     | 1.4      |
| 4        | 4.69    | 5.09    | 4.39    | 5.15    | 5.27    | 4.93    | 4.92    | 4.98    | 5.33    | 5.35     | 2.59     | 1.4      |
| 5        | 4.71    | 4.86    | 5.12    | 5.26    | 5.25    | 5.02    | 5.54    | 5.32    | 5.35    | 4.9      | 3.01     | 1.4      |

| Groups ID |                             |
|-----------|-----------------------------|
| Group 1:  | 10 mcg CfaE + 0.01 mcg mL   |
| Group 2:  | 10 mcg CfaE + 0.05 mcg mL   |
| Group 3:  | 10 mcg CfaE + 0.1 mcg mL    |
| Group 4:  | 10 mcg CfaE + 0.5 mcg mL    |
| Group 5:  | 10 mcg CfaE + 2.5 mcg mL    |
| Group 6:  | 10 mcg CfaE + 0.01 mcg dmLT |
| Group 7:  | 10 mcg CfaE + 0.05 mcg dmLT |
| Group 8:  | 10 mcg CfaE + 0.1 mcg dmLT  |
| Group 9:  | 10 mcg CfaE + 0.5 mcg dmLT  |
| Group 10: | 10 mcg CfaE + 2.5 mcg dmLT  |
| Group 11: | 10 mcg CfaE                 |
| Group 12: | Saline                      |

Fig. 4C

| Duplicates | IgG1       |           |           |          |          |              |             |             |            |            |          | IgG2a     |            |           |           |          |          |              |             |             |            |            |          |           |
|------------|------------|-----------|-----------|----------|----------|--------------|-------------|-------------|------------|------------|----------|-----------|------------|-----------|-----------|----------|----------|--------------|-------------|-------------|------------|------------|----------|-----------|
| Assay 1    | 2500 mL G1 | 500 mL G1 | 100 mL G1 | 50 mL G1 | 10 mL G1 | 2500 dmLT G1 | 500 dmLT g1 | 100 dmLT G1 | 50 dmLT G1 | 10 dmLT g1 | CfaEB G1 | Saline G1 | 2500 mL 2a | 500 mL 2a | 100 mL 2a | 50 mL 2a | 10 mL 2a | 2500 dmLT 2a | 500 dmLT 2a | 100 dmLT 2a | 50 dmLT 2a | 10 dmLT 2a | CfaEB 2a | Saline 2a |
| Assay 2    | 5.535      | 5.588     | 5.539     | 5.667    | 5.678    | 5.63         | 5.694       | 5.613       | 5.72       | 5.684      | 4.168    | 1.916     | 3.818      | 3.393     | 3.03      | 2.839    | 3.224    | 3.9          | 3.587       | 3.361       | 3.288      | 3.015      | 1.4      | 1.4       |
|            | 5.561      | 5.553     | 5.475     | 5.583    | 5.565    | 5.522        | 5.523       | 5.594       | 5.644      | 5.6        | 4.154    | 1.683     | 3.836      | 3.488     | 3.13      | 2.957    | 3.278    | 3.804        | 3.427       | 3.293       | 3.153      | 2.996      | 1.4      | 1.4       |

Fig. 4D

| Duplicates     | Group 1 | Group 2 | Group 3 | Group 4 | Group 5 | Group 6 | Group 7 | Group 8 | Group 9 | Group 10 | Group 11 | Group 12 |
|----------------|---------|---------|---------|---------|---------|---------|---------|---------|---------|----------|----------|----------|
| <b>Assay 1</b> | 3.31    | 3.11    | 2.93    | 2.88    | 3.06    | 3.42    | 3.38    | 3.34    | 3.33    | 3.37     | 1.4      | 1.4      |
| <b>Assay 2</b> | 3.33    | 3.1     | 3.01    | 2.96    | 3.09    | 3.47    | 3.44    | 3.29    | 3.38    | 3.11     | 1.72     | 1.4      |

| Groups ID        |                             |
|------------------|-----------------------------|
| <b>Group 1:</b>  | 10 mcg CfaE + 0.01 mcg mL   |
| <b>Group 2:</b>  | 10 mcg CfaE + 0.05 mcg mL   |
| <b>Group 3:</b>  | 10 mcg CfaE + 0.1 mcg mL    |
| <b>Group 4:</b>  | 10 mcg CfaE + 0.5 mcg mL    |
| <b>Group 5:</b>  | 10 mcg CfaE + 2.5 mcg mL    |
| <b>Group 6:</b>  | 10 mcg CfaE + 0.01 mcg dmLT |
| <b>Group 7:</b>  | 10 mcg CfaE + 0.05 mcg dmLT |
| <b>Group 8:</b>  | 10 mcg CfaE + 0.1 mcg dmLT  |
| <b>Group 9:</b>  | 10 mcg CfaE + 0.5 mcg dmLT  |
| <b>Group 10:</b> | 10 mcg CfaE + 2.5 mcg dmLT  |
| <b>Group 11:</b> | 10 mcg CfaE                 |
| <b>Group 12:</b> | Saline                      |



Fig. 4E

| Animal # | Group 1 | Group 2 | Group 3 | Group 4 | Group 5 | Group 6 | Group 7 | Group 8 | Group 9 | Group 10 | Group 11 | Group 12 |
|----------|---------|---------|---------|---------|---------|---------|---------|---------|---------|----------|----------|----------|
| 1        | 1.97    | 2.62    | 2.68    | 2.78    | 2.64    | 2.56    | 3.06    | 2.63    | 3.69    | 2.83     | 0.88     | 0.88     |
| 2        | 2.49    | 2.4     | 2.12    | 2.21    | 2.7     | 3.34    | 2.66    | 3.08    | 3.28    | 1.95     | 0.88     | 0.88     |
| 3        | 2.52    | 2.35    | 2.25    | 1.62    | 2.9     | 2.87    | 3.06    | 2.92    | 2.93    | 3.43     | 0.88     | 0.88     |
| 4        | 2.09    | 2.48    | 2.58    | 2.32    | 2.36    | 3.3     | 3.26    | 3.32    | 2.04    | 3.54     | 0.88     | 0.88     |
| 5        | 2.81    | 2.59    | 2.77    | 2.83    | 2.41    | 2.4     | 3.21    | 2.92    | 2.56    | 1.9      | 0.88     | 0.88     |

| Groups ID        |                             |
|------------------|-----------------------------|
| <b>Group 1:</b>  | 10 mcg CfaE + 0.01 mcg mLT  |
| <b>Group 2:</b>  | 10 mcg CfaE + 0.05 mcg mLT  |
| <b>Group 3:</b>  | 10 mcg CfaE + 0.1 mcg mLT   |
| <b>Group 4:</b>  | 10 mcg CfaE + 0.5 mcg mLT   |
| <b>Group 5:</b>  | 10 mcg CfaE + 2.5 mcg mLT   |
| <b>Group 6:</b>  | 10 mcg CfaE + 0.01 mcg dmLT |
| <b>Group 7:</b>  | 10 mcg CfaE + 0.05 mcg dmLT |
| <b>Group 8:</b>  | 10 mcg CfaE + 0.1 mcg dmLT  |
| <b>Group 9:</b>  | 10 mcg CfaE + 0.5 mcg dmLT  |
| <b>Group 10:</b> | 10 mcg CfaE + 2.5 mcg dmLT  |
| <b>Group 11:</b> | 10 mcg CfaE                 |
| <b>Group 12:</b> | Saline                      |

Fig. 5A

| Animal # | Group 1 | Group 2 | Group 3 | Group 4 | Group 5 | Group 6 | Group 7 | Group 8 | Group 9 | Group 10 | Group 11 | Group 12 |
|----------|---------|---------|---------|---------|---------|---------|---------|---------|---------|----------|----------|----------|
| 1        | 4.986   | 5.056   | 4.87    | 4.879   | 5.492   | 5.106   | 5.581   | 5.306   | 5.884   | 4.762    | 1.98     | 1.4      |
| 2        | 5.046   | 5.605   | 5.216   | 5.076   | 4.74    | 5.187   | 5.095   | 5.925   | 4.906   | 4.661    | 1.4      | 1.4      |
| 3        | 5.091   | 5.047   | 5.215   | 5.081   | 5.128   | 5.137   | 5.362   | 6.005   | 5.115   | 5.084    | 4.394    | 1.4      |
| 4        | 5.072   | 5.295   | 5.237   | 5.308   | 5.199   | 5.405   | 5.152   | 5.715   | 5.635   | 4.721    | 2.367    | 1.4      |
| 5        | 5.48    | 5.02    | 4.974   | 5.529   | 5.158   | 5.381   | 5.136   | 5.875   | 5.052   | 5.835    | 1.961    | 1.4      |

| Groups ID        |                             |
|------------------|-----------------------------|
| <b>Group 1:</b>  | 10 mcg CfaE + 0.01 mcg mLT  |
| <b>Group 2:</b>  | 10 mcg CfaE + 0.05 mcg mLT  |
| <b>Group 3:</b>  | 10 mcg CfaE + 0.1 mcg mLT   |
| <b>Group 4:</b>  | 10 mcg CfaE + 0.5 mcg mLT   |
| <b>Group 5:</b>  | 10 mcg CfaE + 2.5 mcg mLT   |
| <b>Group 6:</b>  | 10 mcg CfaE + 0.01 mcg dmLT |
| <b>Group 7:</b>  | 10 mcg CfaE + 0.05 mcg dmLT |
| <b>Group 8:</b>  | 10 mcg CfaE + 0.1 mcg dmLT  |
| <b>Group 9:</b>  | 10 mcg CfaE + 0.5 mcg dmLT  |
| <b>Group 10:</b> | 10 mcg CfaE + 2.5 mcg dmLT  |
| <b>Group 11:</b> | 10 mcg CfaE                 |
| <b>Group 12:</b> | Saline                      |

Fig. 5B

| Animal # | Group 1 | Group 2 | Group 3 | Group 4 | Group 5 | Group 6 | Group 7 | Group 8 | Group 9 | Group 10 | Group 11 | Group 12 |
|----------|---------|---------|---------|---------|---------|---------|---------|---------|---------|----------|----------|----------|
| 1        | 8192    | 4096    | 2048    | 3072    | 4096    | 2048    | 4096    | 4096    | 4096    | 3072     | 8        | 8        |
| 2        | 8192    | 8192    | 2048    | 3072    | 2048    | 3072    | 3072    | 4096    | 4096    | 1024     | 32       |          |
| 3        | 6144    | 8192    | 4096    | 4096    | 4096    | 3072    | 4096    | 6144    | 6144    | 1024     | 24       |          |
| 4        | 8192    | 8192    | 2048    | 8192    | 4096    | 6144    | 4096    | 4096    | 6144    | 1024     | 16       |          |
| 5        | 8192    | 6144    | 3072    | 8192    | 4096    | 4096    | 3072    | 2048    | 6144    | 2048     | 32       |          |

| Groups ID        |                             |
|------------------|-----------------------------|
| <b>Group 1:</b>  | 10 mcg CfaE + 0.01 mcg mLT  |
| <b>Group 2:</b>  | 10 mcg CfaE + 0.05 mcg mLT  |
| <b>Group 3:</b>  | 10 mcg CfaE + 0.1 mcg mLT   |
| <b>Group 4:</b>  | 10 mcg CfaE + 0.5 mcg mLT   |
| <b>Group 5:</b>  | 10 mcg CfaE + 2.5 mcg mLT   |
| <b>Group 6:</b>  | 10 mcg CfaE + 0.01 mcg dmLT |
| <b>Group 7:</b>  | 10 mcg CfaE + 0.05 mcg dmLT |
| <b>Group 8:</b>  | 10 mcg CfaE + 0.1 mcg dmLT  |
| <b>Group 9:</b>  | 10 mcg CfaE + 0.5 mcg dmLT  |
| <b>Group 10:</b> | 10 mcg CfaE + 2.5 mcg dmLT  |
| <b>Group 11:</b> | 10 mcg CfaE                 |
| <b>Group 12:</b> | Saline                      |

Fig. 6A

| Study day/Animal # | Group 1 |      |      |      |      | Group 2 |      |      |      |      | Group 3 |      |      |      |      | Group 4 |      |    |     |      | Group 5 |      |      |      |      | Group 6 |     |     |      |      | Group 7 |      |      |     |      | Group 8 |     |      |      |      | Group 9 |      |      |     |      | Group 10 |      |      |      |      | Group 11 |     |     |     |     | Group 12 |  |  |  |  |
|--------------------|---------|------|------|------|------|---------|------|------|------|------|---------|------|------|------|------|---------|------|----|-----|------|---------|------|------|------|------|---------|-----|-----|------|------|---------|------|------|-----|------|---------|-----|------|------|------|---------|------|------|-----|------|----------|------|------|------|------|----------|-----|-----|-----|-----|----------|--|--|--|--|
|                    | Pool/#1 | #2   | #3   | #4   | #5   | Pool/#1 | #2   | #3   | #4   | #5   | Pool/#1 | #2   | #3   | #4   | #5   | Pool/#1 | #2   | #3 | #4  | #5   | Pool/#1 | #2   | #3   | #4   | #5   | Pool/#1 | #2  | #3  | #4   | #5   | Pool/#1 | #2   | #3   | #4  | #5   | Pool/#1 | #2  | #3   | #4   | #5   | Pool/#1 | #2   | #3   | #4  | #5   | Pool/#1  | #2   | #3   | #4   | #5   |          |     |     |     |     |          |  |  |  |  |
| 0                  | 1.4     |      |      |      |      | 1.4     |      |      |      |      | 1.4     |      |      |      |      | 1.4     |      |    |     |      | 1.4     |      |      |      |      | 1.4     |     |     |      |      | 1.4     |      |      |     |      | 1.4     |     |      |      |      | 1.4     |      |      |     |      | 1.4      |      |      |      |      |          |     |     |     |     |          |  |  |  |  |
| 14                 | 4.27    |      |      |      |      | 4.1     |      |      |      |      | 3.54    |      |      |      |      | 4.09    |      |    |     |      | 4.65    |      |      |      |      | 3.73    |     |     |      |      | 3.79    |      |      |     |      | 4.27    |     |      |      |      | 3.52    |      |      |     |      | 1.4      |      |      |      |      |          |     |     |     |     |          |  |  |  |  |
| 28                 | 4.89    |      |      |      |      | 5.41    |      |      |      |      | 4.85    |      |      |      |      | 4.41    |      |    |     |      | 5.43    |      |      |      |      | 5.3     |     |     |      |      | 5.3     |      |      |     |      | 4.73    |     |      |      |      | 4.73    |      |      |     |      | 1.4      |      |      |      |      |          |     |     |     |     |          |  |  |  |  |
| 42                 | 4.9     | 5.51 | 4.94 | 4.88 | 4.87 | 5.42    | 4.99 | 4.78 | 5.63 | 4.41 | 5.48    | 5.53 | 4.88 | 4.44 | 4.97 | 4.93    | 4.36 | 5  | 4.7 | 4.67 | 4.55    | 5.44 | 4.95 | 4.33 | 4.92 | 5.53    | 5.6 | 5.8 | 5.82 | 6.06 | 5.33    | 4.86 | 5.64 | 5.5 | 5.35 | 5.74    | 4.7 | 5.74 | 5.61 | 5.63 | 5.73    | 5.27 | 5.34 | 5.6 | 4.79 | 4.63     | 4.54 | 4.91 | 4.93 | 4.74 | 1.4      | 1.4 | 1.4 | 1.4 | 1.4 |          |  |  |  |  |

**Groups ID**  
 Group 1: 10 mcg CfaE + 0.01 mcg mL T  
 Group 2: 10 mcg CfaE + 0.05 mcg mL T  
 Group 3: 10 mcg CfaE + 0.1 mcg mL T  
 Group 4: 10 mcg CfaE + 0.5 mcg mL T  
 Group 5: 10 mcg CfaE + 2.5 mcg mL T  
 Group 6: 10 mcg CfaE + 0.01 mcg dmL T  
 Group 7: 10 mcg CfaE + 0.05 mcg dmL T  
 Group 8: 10 mcg CfaE + 0.1 mcg dmL T  
 Group 9: 10 mcg CfaE + 0.5 mcg dmL T  
 Group 10: 10 mcg CfaE + 2.5 mcg dmL T  
 Group 11: 10 mcg CfaE  
 Group 12: Saline

Fig. 6B

| Animal # | Group 1 | Group 2 | Group 3 | Group 4 | Group 5 | Group 6 | Group 7 | Group 8 | Group 9 | Group 10 | Group 11 | Group 12 |
|----------|---------|---------|---------|---------|---------|---------|---------|---------|---------|----------|----------|----------|
| 1        | 4.9     | 5.42    | 5.48    | 4.93    | 4.55    | 5.53    | 5.33    | 5.74    | 5.73    | 4.63     | 1.4      | 1.4      |
| 2        | 5.51    | 4.99    | 5.53    | 4.36    | 5.44    | 5.6     | 4.86    | 4.7     | 5.27    | 4.54     | 1.4      | 1.4      |
| 3        | 4.94    | 4.78    | 4.88    | 5       | 4.95    | 5.8     | 5.64    | 5.74    | 5.34    | 4.91     | 1.4      | 1.4      |
| 4        | 4.88    | 5.63    | 4.44    | 4.7     | 4.33    | 5.82    | 5.5     | 5.61    | 5.6     | 4.93     | 1.4      | 1.4      |
| 5        | 4.87    | 4.41    | 4.97    | 4.67    | 4.92    | 6.06    | 5.35    | 5.63    | 4.79    | 4.74     | 1.4      | 1.4      |

| Groups ID |                             |
|-----------|-----------------------------|
| Group 1:  | 10 mcg CfaE + 0.01 mcg mL   |
| Group 2:  | 10 mcg CfaE + 0.05 mcg mL   |
| Group 3:  | 10 mcg CfaE + 0.1 mcg mL    |
| Group 4:  | 10 mcg CfaE + 0.5 mcg mL    |
| Group 5:  | 10 mcg CfaE + 2.5 mcg mL    |
| Group 6:  | 10 mcg CfaE + 0.01 mcg dmLT |
| Group 7:  | 10 mcg CfaE + 0.05 mcg dmLT |
| Group 8:  | 10 mcg CfaE + 0.1 mcg dmLT  |
| Group 9:  | 10 mcg CfaE + 0.5 mcg dmLT  |
| Group 10: | 10 mcg CfaE + 2.5 mcg dmLT  |
| Group 11: | 10 mcg CfaE                 |
| Group 12: | Saline                      |

Fig. 6C

|            |         | IgG1   |        |       |       |           |          |          |         |         |       |        |
|------------|---------|--------|--------|-------|-------|-----------|----------|----------|---------|---------|-------|--------|
| Duplicates | 2500 mL | 500 mL | 100 mL | 50 mL | 10 mL | 2500 dmLT | 500 dmLT | 100 dmLT | 50 dmLT | 10 dmLT | CfaEB | Saline |
| Assay 1    | 5.646   | 5.576  | 5.563  | 5.497 | 5.42  | 5.82      | 5.574    | 5.678    | 5.6     | 5.468   | 2.95  | 2.567  |
| Assay 2    | 5.536   | 5.497  | 5.52   | 5.448 | 5.38  | 5.726     | 5.492    | 5.549    | 5.526   | 5.395   | 2.964 | 2.77   |

|            |         | IgG2a  |        |       |       |           |          |          |         |         |       |        |
|------------|---------|--------|--------|-------|-------|-----------|----------|----------|---------|---------|-------|--------|
| Duplicates | 2500 mL | 500 mL | 100 mL | 50 mL | 10 mL | 2500 dmLT | 500 dmLT | 100 dmLT | 50 dmLT | 10 dmLT | CfaEB | Saline |
| Assay 1    | 4.722   | 4.643  | 3.78   | 3.714 | 3.68  | 4.842     | 4.479    | 4.649    | 4.706   | 3.61    | 1.4   | 1.4    |
| Assay 2    | 4.771   | 4.609  | 3.788  | 3.709 | 3.67  | 4.926     | 4.459    | 4.646    | 4.672   | 3.676   | 1.4   | 1.4    |

Fig. 7A

IFN-gamma

| Duplicates | CfaE-specific |                |             |               |             |               |            |              |            |              |               | LTB-specific |             |               |            |              |            |              |           |             |           |             |              |            |
|------------|---------------|----------------|-------------|---------------|-------------|---------------|------------|--------------|------------|--------------|---------------|--------------|-------------|---------------|------------|--------------|------------|--------------|-----------|-------------|-----------|-------------|--------------|------------|
|            | 2500 mL CfaE  | 2500 dmLT CfaE | 500 mL CfaE | 500 dmLT CfaE | 100 mL CfaE | 100 dmLT CfaE | 50 mL CfaE | 50 dmLT CfaE | 10 mL CfaE | 10 dmLT CfaE | dscCfaEB CfaE | Saline CfaE  | 2500 mL LTB | 2500 dmLT LTB | 500 mL LTB | 500 dmLT LTB | 100 mL LTB | 100 dmLT LTB | 50 mL LTB | 50 dmLT LTB | 10 mL LTB | 10 dmLT LTB | dscCfaEB LTB | Saline LTB |
| Assay 1    | 89.66         | 44.01          | 164.02      | 11.31         | 187.79      | 1.94          | 128.95     | 1.87         | 14.51      | 8.65         | 0.24          | 0.15         | 0.45        | 23.48         | 0.27       | 1.79         | 0.57       | 1.23         | 0.67      | 2.64        | 0         | 1.81        | 0            | 0          |
| Assay 2    | 108.94        | 45.93          | 193.81      | 11.54         | 196.34      | 2.11          | 171.16     | 2.1          | 22.82      | 6.35         | 0.41          | 0.05         | 0.61        | 32.83         | 0.62       | 1.68         | 0.91       | 1.55         | 0.3       | 1.62        | 0.21      | 2.44        | 0.05         | 0.18       |

Fig. 7B  
IL-4

| Duplicates | CfaE-specific |                |             |               |             |               |            |              |            |              |               | LTB-specific |             |               |            |              |            |              |           |             |           |             |              |            |
|------------|---------------|----------------|-------------|---------------|-------------|---------------|------------|--------------|------------|--------------|---------------|--------------|-------------|---------------|------------|--------------|------------|--------------|-----------|-------------|-----------|-------------|--------------|------------|
|            | 2500 mL CfaE  | 2500 dmLT CfaE | 500 mL CfaE | 500 dmLT CfaE | 100 mL CfaE | 100 dmLT CfaE | 50 mL CfaE | 50 dmLT CfaE | 10 mL CfaE | 10 dmLT CfaE | dscCfaEB CfaE | Saline CfaE  | 2500 mL LTB | 2500 dmLT LTB | 500 mL LTB | 500 dmLT LTB | 100 mL LTB | 100 dmLT LTB | 50 mL LTB | 50 dmLT LTB | 10 mL LTB | 10 dmLT LTB | dscCfaEB LTB | Saline LTB |
| Assay 1    | 145.03        | 279.72         | 305.06      | 80.04         | 121.89      | 131.63        | 223.79     | 145.03       | 133.78     | 109.15       | 2.11          | 0.1          | 10.93       | 31.51         | 14.03      | 18.7         | 9.8        | 8.91         | 5.26      | 10.88       | 8.1       | 5.87        | 0.32         | 0.1        |
| Assay 2    | 147.95        | 305.29         | 355.65      | 84.11         | 124.57      | 140.83        | 219.36     | 160.75       | 137.38     | 118.14       | 2.39          | 0.08         | 11.32       | 35.97         | 15.38      | 21.24        | 10.27      | 8.96         | 6.29      | 13.83       | 10.19     | 7.01        | 0.36         | 0.11       |



Fig. 7C  
IL-5

|            | CfaE-specific  |                |               |               |               |               |              |              |              |              |                | Saline CfaE |
|------------|----------------|----------------|---------------|---------------|---------------|---------------|--------------|--------------|--------------|--------------|----------------|-------------|
| Duplicates | 2500 mL T CfaE | 2500 dmLT CfaE | 500 mL T CfaE | 500 dmLT CfaE | 100 mL T CfaE | 100 dmLT CfaE | 50 mL T CfaE | 50 dmLT CfaE | 10 mL T CfaE | 10 dmLT CfaE | dscCfaE B CfaE | Saline CfaE |
| Assay 1    | 915.42         | 1132.31        | 1978.78       | 709.46        | 1265.85       | 1056.77       | 2574.91      | 868.94       | 2644.47      | 1379.95      | 37.82          | 0           |
| Assay 2    | 985.49         | 1386.54        | 2274.14       | 711.54        | 1300.31       | 1057.18       | 2653.17      | 1063.84      | 2724.97      | 1621.22      | 45.82          | 0           |

|            | LTB-specific  |               |              |              |              |              |             |             |             |             |               | dscCfaE B LTB | Saline LTB |
|------------|---------------|---------------|--------------|--------------|--------------|--------------|-------------|-------------|-------------|-------------|---------------|---------------|------------|
| Duplicates | 2500 mL T LTB | 2500 dmLT LTB | 500 mL T LTB | 500 dmLT LTB | 100 mL T LTB | 100 dmLT LTB | 50 mL T LTB | 50 dmLT LTB | 10 mL T LTB | 10 dmLT LTB | dscCfaE B LTB | Saline LTB    |            |
| Assay 1    | 21.11         | 92.86         | 185.61       | 74.21        | 240.12       | 65.82        | 82.72       | 66.62       | 155.33      | 32.42       | 0             | 0             |            |
| Assay 2    | 24.04         | 120.23        | 235.96       | 88.38        | 250.77       | 63.8         | 91.84       | 82.86       | 167.19      | 36.85       | 0             | 0             |            |

Fig. 7D  
IL-10

| Duplicates | CfaE-specific |                |             |               |             |               |            |              |            |              |               | LTB-specific |             |               |            |              |            |              |           |             |           |             |              |            |
|------------|---------------|----------------|-------------|---------------|-------------|---------------|------------|--------------|------------|--------------|---------------|--------------|-------------|---------------|------------|--------------|------------|--------------|-----------|-------------|-----------|-------------|--------------|------------|
|            | 2500 mL CfaE  | 2500 dmLT CfaE | 500 mL CfaE | 500 dmLT CfaE | 100 mL CfaE | 100 dmLT CfaE | 50 mL CfaE | 50 dmLT CfaE | 10 mL CfaE | 10 dmLT CfaE | dscCfaEB CfaE | Saline CfaE  | 2500 mL LTB | 2500 dmLT LTB | 500 mL LTB | 500 dmLT LTB | 100 mL LTB | 100 dmLT LTB | 50 mL LTB | 50 dmLT LTB | 10 mL LTB | 10 dmLT LTB | dscCfaEB LTB | Saline LTB |
| Assay 1    | 202.71        | 312.14         | 415.47      | 156.89        | 249.65      | 177.05        | 296.99     | 114.27       | 305.9      | 159.63       | 0.22          | 0            | 7.27        | 26.66         | 15.19      | 12.03        | 9.45       | 8.44         | 6.61      | 9.54        | 6.86      | 2.18        | 0            | 0          |
| Assay 2    | 211.05        | 392.6          | 444.19      | 166.11        | 255.4       | 198           | 294.06     | 134.83       | 326.91     | 190.73       | 0             | 0            | 8.1         | 38.68         | 16.26      | 9.79         | 10.48      | 7.6          | 8.1       | 11.51       | 9.45      | 2.63        | 0            | 0          |

Fig. 7E  
IL-17

| Duplicates | CfaE-specific  |                 |               |                |               |                |              |               |              |               |               | LTB-specific |               |                |            |               |              |               |             |              |             |              |              |            |
|------------|----------------|-----------------|---------------|----------------|---------------|----------------|--------------|---------------|--------------|---------------|---------------|--------------|---------------|----------------|------------|---------------|--------------|---------------|-------------|--------------|-------------|--------------|--------------|------------|
|            | 2500 mL T CfaE | 2500 dmL T CfaE | 500 mL T CfaE | 500 dmL T CfaE | 100 mL T CfaE | 100 dmL T CfaE | 50 mL T CfaE | 50 dmL T CfaE | 10 mL T CfaE | 10 dmL T CfaE | dscCfaEB CfaE | Saline CfaE  | 2500 mL T LTB | 2500 dmL T LTB | 500 mL LTB | 500 dmL T LTB | 100 mL T LTB | 100 dmL T LTB | 50 mL T LTB | 50 dmL T LTB | 10 mL T LTB | 10 dmL T LTB | dscCfaEB LTB | Saline LTB |
| Assay 1    | 28.16          | 23.64           | 23.38         | 0              | 13.51         | 0              | 9.69         | 0             | 0            | 0             | 0             | 0            | 0             | 0              | 0          | 0             | 17.71        | 82.92         | 45.61       | 0            | 151.13      | 143.93       | 0            | 0          |
| Assay 2    | 27.07          | 32.08           | 34.34         | 0              | 14.2          | 0              | 10.28        | 0             | 0            | 0             | 0             | 0            | 0             | 0              | 0          | 0             | 16.16        | 84.05         | 54.4        | 0            | 217.8       | 189.84       | 0            | 0          |

Suppl Fig. 2A-F

| Erythema site 1: Suppl. 2A   |    |    |    |    |    |    |    | Erythema site 2: Suppl. 2B   |    |    |    |    |    |    |    | Erythema site 3: Suppl. 2C   |    |    |    |    |    |    |    | Edema site 1: Suppl. 2D       |    |    |    |    |    |    |    | Edema site 2: Suppl. 2E        |    |    |    |    |    |    |    | Edema site 3: Suppl. 2F |    |    |    |    |    |    |    |        |    |   |   |   |   |   |   |   |   |   |   |   |   |   |   |   |   |   |   |
|------------------------------|----|----|----|----|----|----|----|------------------------------|----|----|----|----|----|----|----|------------------------------|----|----|----|----|----|----|----|-------------------------------|----|----|----|----|----|----|----|--------------------------------|----|----|----|----|----|----|----|-------------------------|----|----|----|----|----|----|----|--------|----|---|---|---|---|---|---|---|---|---|---|---|---|---|---|---|---|---|---|
| 10ug dscCfaEB + 10ng dmLT/mL |    |    |    |    |    |    |    | 10ug dscCfaEB + 50ng dmLT/mL |    |    |    |    |    |    |    | 10ug dscCfaEB + 100ngdmLT/mL |    |    |    |    |    |    |    | 10ug dscCfaEB + 500ng dmLT/mL |    |    |    |    |    |    |    | 10ug dscCfaEB + 2500ng dmLT/mL |    |    |    |    |    |    |    | 10ug dscCfaEB           |    |    |    |    |    |    |    | Saline |    |   |   |   |   |   |   |   |   |   |   |   |   |   |   |   |   |   |   |
| Adj./Animal #                | #1 | #2 | #3 | #4 | #5 | #6 | #7 | #1                           | #2 | #3 | #4 | #5 | #6 | #7 | #1 | #2                           | #3 | #4 | #5 | #6 | #7 | #1 | #2 | #3                            | #4 | #5 | #6 | #7 | #1 | #2 | #3 | #4                             | #5 | #6 | #7 | #1 | #2 | #3 | #4 | #5                      | #6 | #7 | #1 | #2 | #3 | #4 | #5 | #6     | #7 |   |   |   |   |   |   |   |   |   |   |   |   |   |   |   |   |   |   |
| dmLT                         | 0  | 0  | 0  | 0  | 0  | 0  | 0  | 1                            | 1  | 0  | 1  | 1  | 1  | 1  | 1  | 1                            | 1  | 1  | 1  | 1  | 2  | 1  | 1  | 1                             | 1  | 2  | 1  | 1  | 1  | 2  | 3  | 3                              | 1  | 2  | 2  | 1  | 0  | 0  | 0  | 0                       | 0  | 0  | 0  | 0  | 0  | 0  | 0  | 0      | 0  | 0 | 0 | 0 | 0 | 0 | 0 | 0 | 0 | 0 | 0 | 0 | 0 | 0 | 0 | 0 |   |   |   |
| mLT                          | 0  | 1  | 0  | 1  | 0  | 0  | 0  | 1                            | 1  | 1  | 1  | 2  | 1  | 1  | 1  | 1                            | 1  | 1  | 1  | 1  | 1  | 1  | 2  | 1                             | 1  | 1  | 2  | 2  | 2  | 2  | 2  | 2                              | 1  | 2  | 2  | 2  | 0  | 0  | 0  | 0                       | 0  | 0  | 0  | 0  | 0  | 0  | 0  | 0      | 0  | 0 | 0 | 0 | 0 | 0 | 0 | 0 | 0 | 0 | 0 | 0 | 0 | 0 | 0 | 0 |   |   |   |
| dmLT                         | 0  | 0  | 0  | 0  | 0  | 0  | 0  | 0                            | 0  | 0  | 1  | 1  | 0  | 0  | 1  | 1                            | 0  | 1  | 1  | 1  | 1  | 1  | 2  | 2                             | 2  | 2  | 2  | 1  | 2  | 2  | 2  | 2                              | 2  | 2  | 1  | 2  | 0  | 0  | 0  | 0                       | 0  | 0  | 0  | 0  | 0  | 0  | 0  | 0      | 0  | 0 | 0 | 0 | 0 | 0 | 0 | 0 | 0 | 0 | 0 | 0 | 0 | 0 | 0 | 0 |   |   |   |
| mLT                          | 0  | 0  | 0  | 1  | 1  | 1  | 0  | 0                            | 1  | 1  | 0  | 0  | 1  | 1  | 1  | 2                            | 1  | 1  | 1  | 1  | 1  | 1  | 2  | 1                             | 1  | 2  | 1  | 1  | 2  | 2  | 2  | 2                              | 1  | 2  | 2  | 1  | 0  | 0  | 0  | 0                       | 0  | 0  | 0  | 0  | 0  | 0  | 0  | 0      | 0  | 0 | 0 | 0 | 0 | 0 | 0 | 0 | 0 | 0 | 0 | 0 | 0 | 0 | 0 | 0 |   |   |   |
| dmLT                         | 1  | 2  | 1  | 1  | 2  | 1  | 1  | 1                            | 2  | 2  | 1  | 2  | 1  | 2  | 2  | 2                            | 2  | 2  | 2  | 2  | 2  | 2  | 2  | 2                             | 2  | 2  | 2  | 2  | 2  | 2  | 2  | 2                              | 2  | 2  | 1  | 2  | 0  | 0  | 0  | 0                       | 0  | 0  | 0  | 0  | 0  | 0  | 0  | 0      | 0  | 0 | 0 | 0 | 0 | 0 | 0 | 0 | 0 | 0 | 0 | 0 | 0 | 0 | 0 | 0 |   |   |   |
| mLT                          | 2  | 1  | 2  | 1  | 2  | 2  | 1  | 1                            | 2  | 2  | 1  | 1  | 2  | 1  | 2  | 2                            | 2  | 2  | 2  | 2  | 2  | 2  | 2  | 1                             | 2  | 2  | 2  | 1  | 2  | 2  | 2  | 2                              | 2  | 2  | 2  | 2  | 0  | 0  | 0  | 0                       | 0  | 0  | 0  | 0  | 0  | 0  | 0  | 0      | 0  | 0 | 0 | 0 | 0 | 0 | 0 | 0 | 0 | 0 | 0 | 0 | 0 | 0 | 0 | 0 |   |   |   |
| dmLT                         | 1  | 1  | 1  | 0  | 0  | 2  | 0  | 2                            | 2  | 1  | 2  | 2  | 2  | 2  | 2  | 2                            | 2  | 2  | 2  | 2  | 2  | 2  | 1  | 1                             | 1  | 2  | 2  | 2  | 1  | 2  | 3  | 3                              | 1  | 3  | 1  | 1  | 0  | 0  | 0  | 0                       | 0  | 0  | 0  | 0  | 0  | 0  | 0  | 0      | 0  | 0 | 0 | 0 | 0 | 0 | 0 | 0 | 0 | 0 | 0 | 0 | 0 | 0 | 0 | 0 |   |   |   |
| mLT                          | 1  | 1  | 1  | 2  | 1  | 2  | 1  | 2                            | 1  | 2  | 2  | 2  | 2  | 1  | 2  | 3                            | 2  | 2  | 2  | 2  | 2  | 2  | 2  | 2                             | 2  | 2  | 2  | 2  | 3  | 2  | 2  | 2                              | 1  | 2  | 2  | 2  | 0  | 0  | 0  | 0                       | 0  | 0  | 0  | 0  | 0  | 0  | 0  | 0      | 0  | 0 | 0 | 0 | 0 | 0 | 0 | 0 | 0 | 0 | 0 | 0 | 0 | 0 | 0 | 0 |   |   |   |
| dmLT                         | 1  | 2  | 1  | 1  | 2  | 1  | 1  | 1                            | 2  | 2  | 1  | 2  | 1  | 2  | 2  | 2                            | 2  | 2  | 2  | 2  | 2  | 2  | 2  | 2                             | 2  | 2  | 2  | 2  | 2  | 2  | 2  | 2                              | 2  | 2  | 1  | 2  | 0  | 0  | 0  | 0                       | 0  | 0  | 0  | 0  | 0  | 0  | 0  | 0      | 0  | 0 | 0 | 0 | 0 | 0 | 0 | 0 | 0 | 0 | 0 | 0 | 0 | 0 | 0 | 0 |   |   |   |
| mLT                          | 2  | 1  | 2  | 1  | 2  | 2  | 1  | 1                            | 2  | 2  | 1  | 1  | 2  | 1  | 2  | 2                            | 2  | 2  | 2  | 2  | 2  | 2  | 2  | 1                             | 2  | 2  | 2  | 1  | 2  | 2  | 2  | 2                              | 2  | 2  | 2  | 2  | 0  | 0  | 0  | 0                       | 0  | 0  | 0  | 0  | 0  | 0  | 0  | 0      | 0  | 0 | 0 | 0 | 0 | 0 | 0 | 0 | 0 | 0 | 0 | 0 | 0 | 0 | 0 | 0 |   |   |   |
| dmLT                         | 1  | 1  | 1  | 1  | 1  | 1  | 0  | 0                            | 0  | 1  | 1  | 1  | 1  | 1  | 1  | 1                            | 2  | 1  | 1  | 1  | 2  | 2  | 2  | 2                             | 2  | 2  | 2  | 2  | 2  | 2  | 2  | 0                              | 0  | 2  | 2  | 0  | 0  | 0  | 0  | 0                       | 0  | 0  | 0  | 0  | 0  | 0  | 0  | 0      | 0  | 0 | 0 | 0 | 0 | 0 | 0 | 0 | 0 | 0 | 0 | 0 | 0 | 0 | 0 |   |   |   |   |
| mLT                          | 1  | 1  | 1  | 1  | 0  | 1  | 0  | 1                            | 1  | 1  | 1  | 1  | 1  | 1  | 1  | 1                            | 1  | 1  | 1  | 1  | 2  | 1  | 2  | 1                             | 2  | 0  | 1  | 1  | 1  | 1  | 1  | 1                              | 0  | 0  | 0  | 0  | 0  | 0  | 0  | 0                       | 0  | 0  | 0  | 0  | 0  | 0  | 0  | 0      | 0  | 0 | 0 | 0 | 0 | 0 | 0 | 0 | 0 | 0 | 0 | 0 | 0 | 0 | 0 | 0 | 0 | 0 | 0 |

Suppl Fig. 3A-C

## Skin pathology scores SD16: Suppl. 3A

| Adjuvant/Dose & site | 2500 S1 | 2500 S2 | 2500 S3 | 500 S1 | 500 S2 | 500 S3 | 100 S1 | 100 S2 | 100 S3 | 50 S1 | 50 S2 | 50 S3 | 10 S1 | 10 S2 | 10 S3 | 2500 S1 | 2500 S2 | 2500 S3 | 500S1 | 500S2 | 500S3 | 100S1 | 100S2 | 100S3 | 50 S1 | 50 S2 | 50 S3 | 10 S1 | 10 S2 | 10 S3 |
|----------------------|---------|---------|---------|--------|--------|--------|--------|--------|--------|-------|-------|-------|-------|-------|-------|---------|---------|---------|-------|-------|-------|-------|-------|-------|-------|-------|-------|-------|-------|-------|
| mLT                  | 2       | 4       | 0       | 3      | 4      | 0      | 2      | 3      | 0      | 2     | 4     | 0     | 1     | 4     | 0     | 1       | 3       | 0       | 3     | 4     | 0     | 3     | 4     | 0     | 1     | 3     | 0     | 1     | 2     | 0     |
| dmLT                 | 2       | 4       | 0       | 3      | 4      | 0      | 3      | 4      | 0      | 3     | 4     | 0     | 1     | 3     | 0     | 3       | 4       | 0       | 3     | 4     | 0     | 1     | 4     | 0     | 2     | 3     | 0     | 0     | 2     | 0     |

## Skin pathology scores SD42: Suppl. 3B

| Adjuvant/Dose & site | 2500 S1 | 2500 S2 | 2500 S3 | 500 S1 | 500 S2 | 500 S3 | 100 S1 | 100 S2 | 100 S3 | 50 S1 | 50 S2 | 50 S3 | 10 S1 | 10 S2 | 10 S3 | 2500 S1 | 2500 S2 | 2500 S3 | 500S1 | 500S2 | 500S3 | 100S1 | 100S2 | 100S3 | 50 S1 | 50 S2 | 50 S3 | 10 S1 | 10 S2 | 10 S3 |
|----------------------|---------|---------|---------|--------|--------|--------|--------|--------|--------|-------|-------|-------|-------|-------|-------|---------|---------|---------|-------|-------|-------|-------|-------|-------|-------|-------|-------|-------|-------|-------|
| mLT                  | 0       | 0       | 0       | 0      | 0      | 4      | 0      | 0      | 2      | 0     | 0     | 2     | 0     | 0     | 0     | 0       | 0       | 2       | 0     | 0     | 2     | 1     | 0     | 2     | 0     | 0     | 0     | 0     | 0     | 2     |
| dmLT                 | 0       | 1       | 2       | 0      | 0      | 3      | 0      | 0      | 2      | 1     | 0     | 0     | 0     | 0     | 2     | 0       | 0       | 1       | 0     | 0     | 2     | 0     | 0     | 1     | 0     | 0     | 2     | 0     | 0     | 3     |

## Edema SD16: Suppl. 3C

| Adjuvant/Dose & site | 2500 S1 | 2500 S2 | 2500 S3 | 500 S1 | 500 S2 | 500 S3 | 100 S1 | 100 S2 | 100 S3 | 50 S1 | 50 S2 | 50 S3 | 10 S1 | 10 S2 | 10 S3 | 2500 S1 | 2500 S2 | 2500 S3 | 500S1 | 500S2 | 500S3 | 100S1 | 100S2 | 100S3 | 50 S1 | 50 S2 | 50 S3 | 10 S1 | 10 S2 | 10 S3 |
|----------------------|---------|---------|---------|--------|--------|--------|--------|--------|--------|-------|-------|-------|-------|-------|-------|---------|---------|---------|-------|-------|-------|-------|-------|-------|-------|-------|-------|-------|-------|-------|
| mLT                  | 1       | 4       | 0       | 1      | 3      | 0      | 1      | 1      | 0      | 1     | 4     | 0     | 1     | 3     | 0     | 1       | 2       | 0       | 2     | 4     | 0     | 2     | 4     | 0     | 1     | 3     | 0     | 1     | 1     | 0     |
| dmLT                 | 1       | 4       | 0       | 1      | 5      | 0      | 2      | 4      | 0      | 1     | 4     | 0     | 1     | 3     | 0     | 2       | 4       | 0       | 2     | 4     | 0     | 1     | 4     | 0     | 1     | 3     | 0     | 0     | 1     | 0     |
