# Supplementary material for: Evaluation of the reactogenicity, adjuvanticity and antigenicity of LT(R192G) and LT(R192G/L211A) by intradermal immunization in mice
Source: PubMed Central journal article supplement (PMC6827915; doi:10.1371/journal.pone.0224073), 2019-11-04

Dose verification western blot

Anti-LTB

1

75 KDa

50 KDa

37 KDa

25 KDa

20 KDa

15 KDa

10 KDa

0.0025

0.005

0.025

0.05

#1

#2

#3

#4

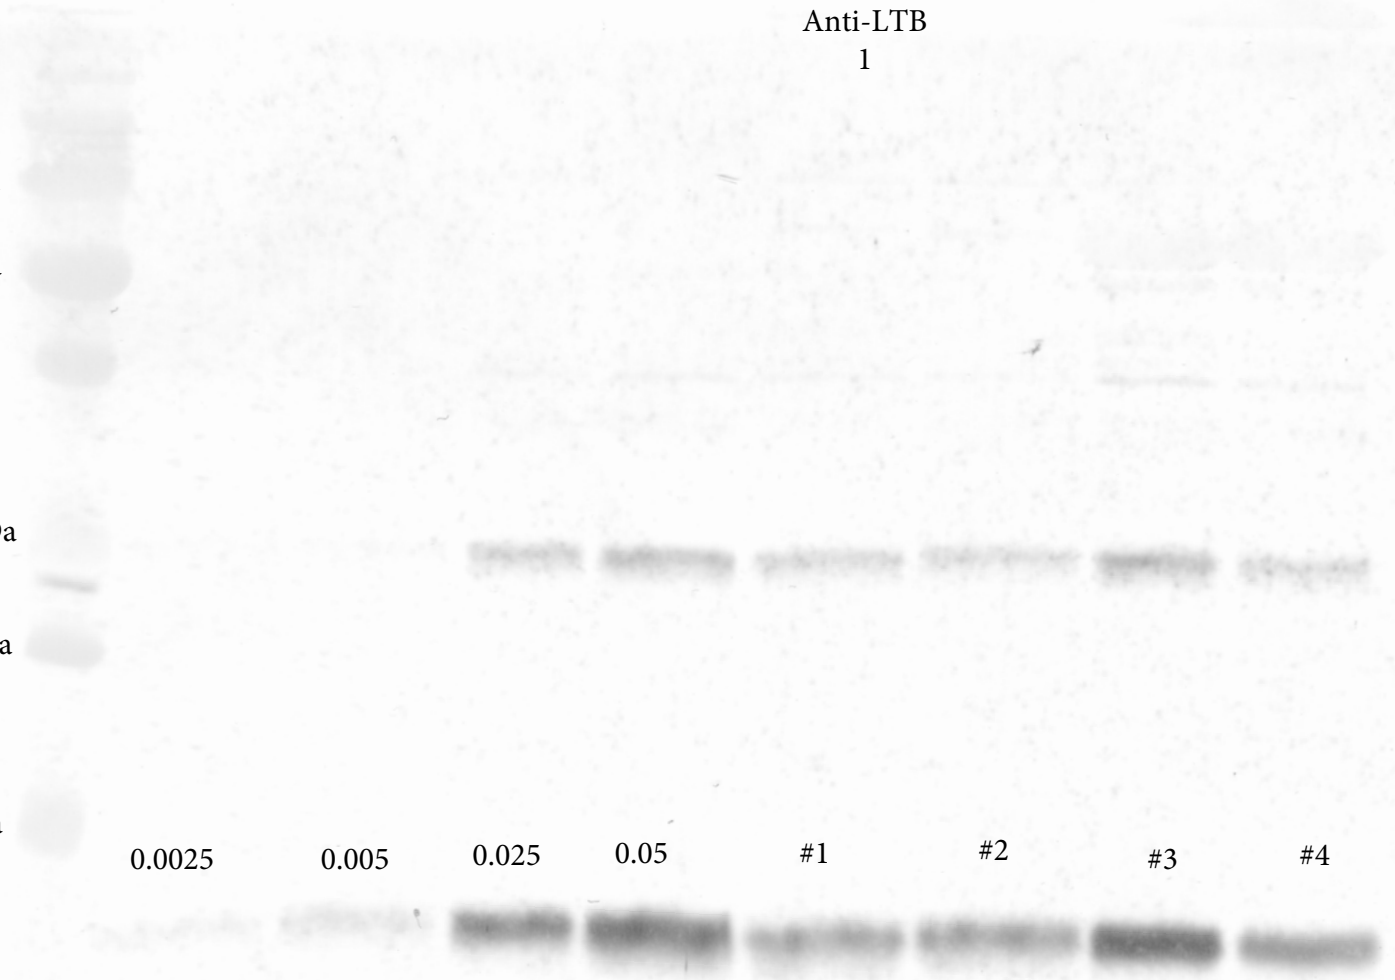

Dose verification western blot

Anti-LTB

2

75 KDa

50 KDa

37 KDa

25 KDa

20 KDa

15 KDa

10 KDa

0.0025

0.005

0.025

0.05

#5

#6

#7

#8

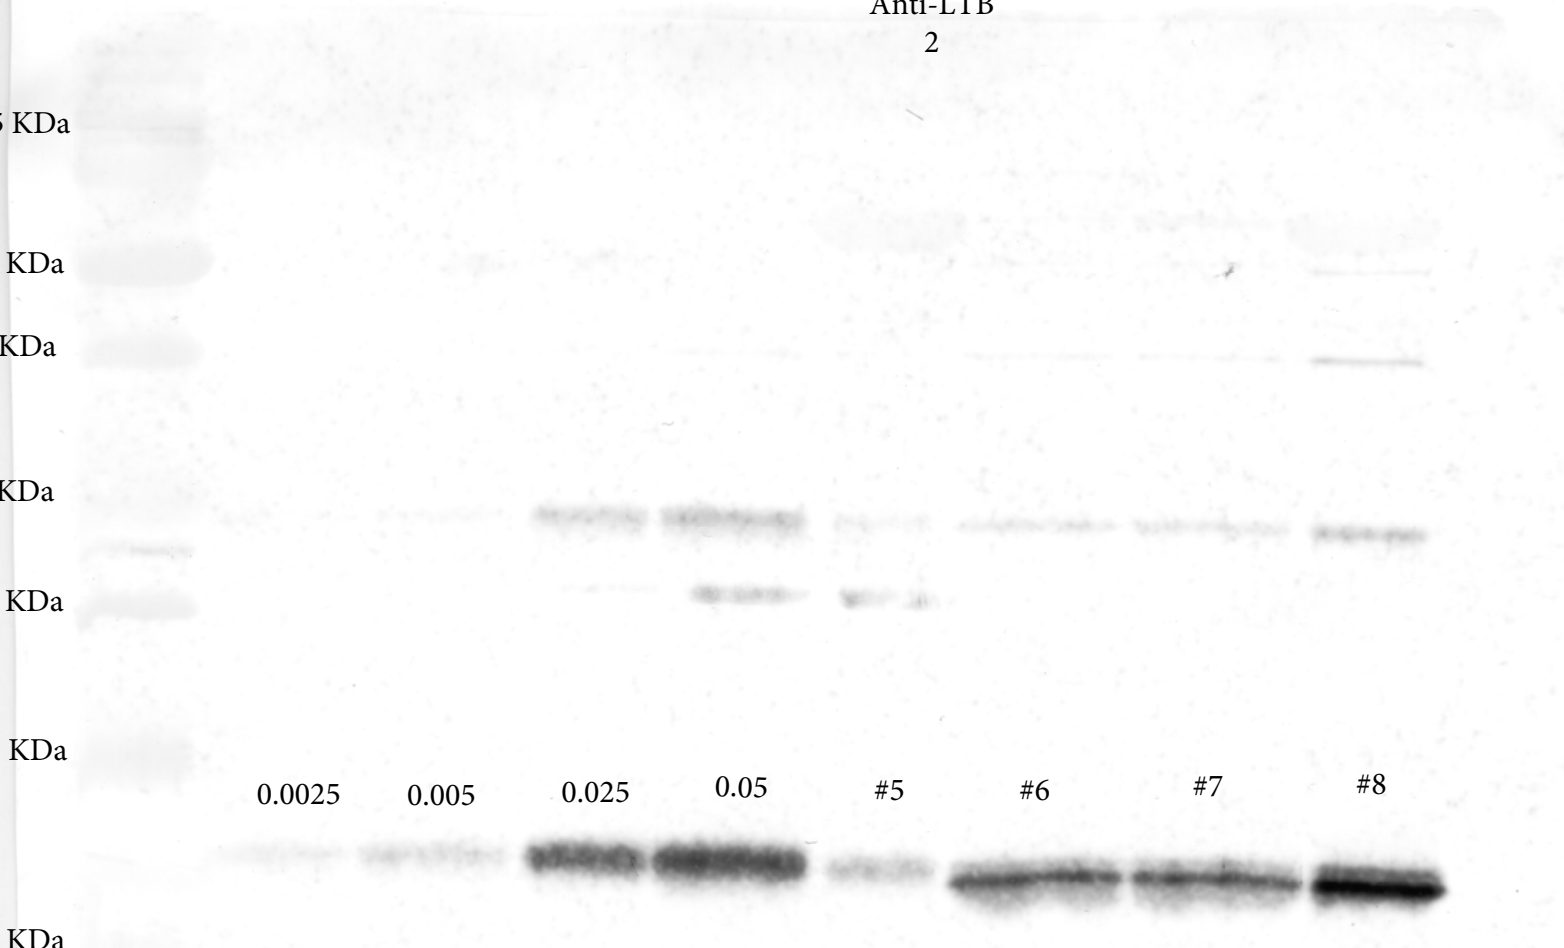

Dose verification western blot

Anti-LTB

3

75 KDa

50 KDa

37 KDa

25 KDa

20 KDa

15 KDa

10 KDa

0.0025

0.005

0.025

0.05

#9

#10

#11

#12

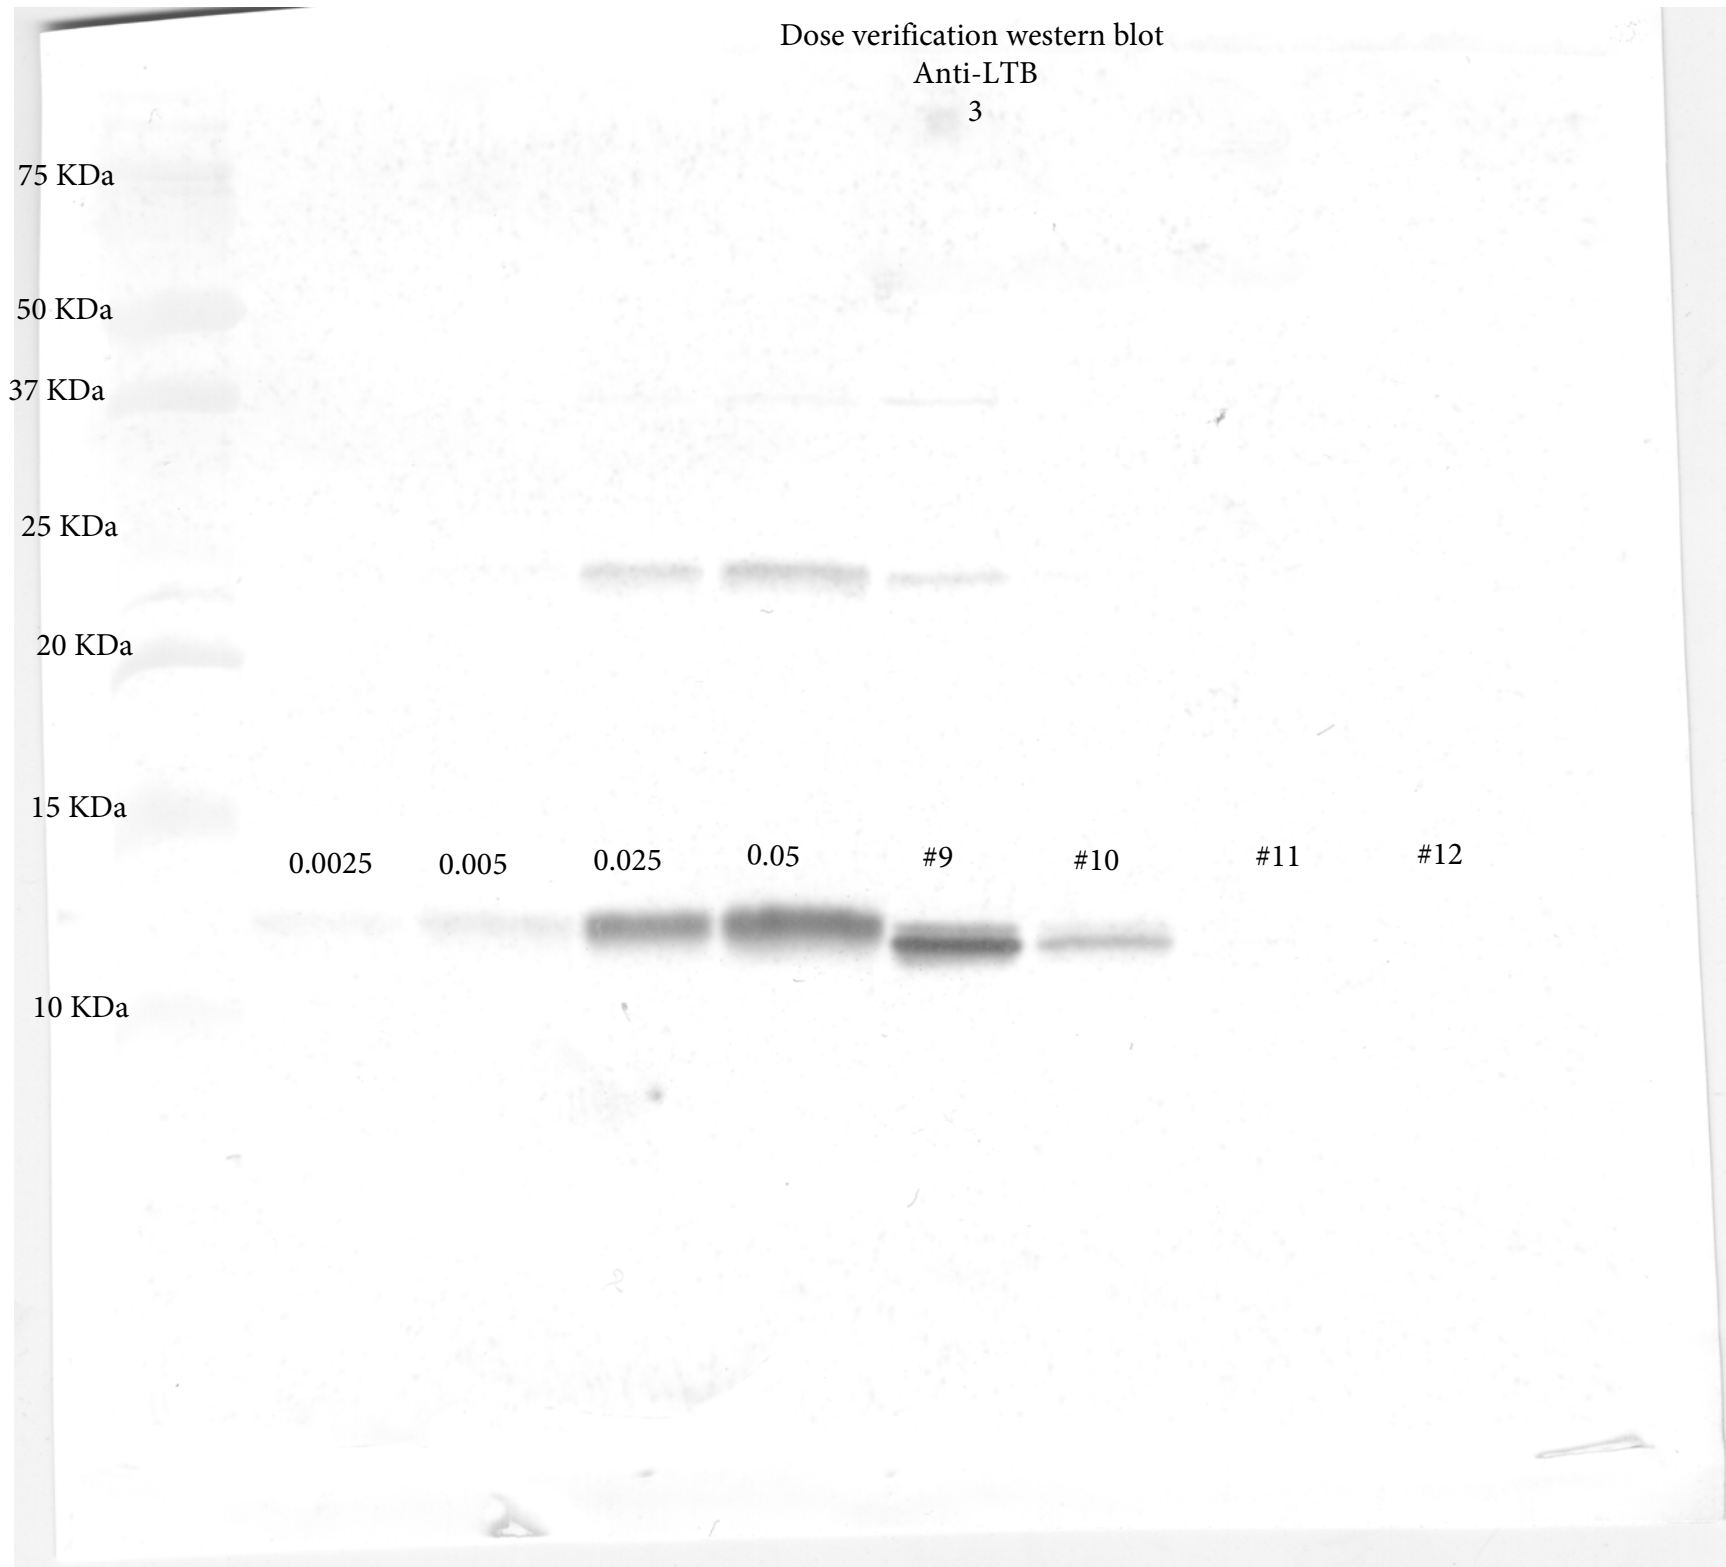



Dose verification

CfaEB

Gel 2

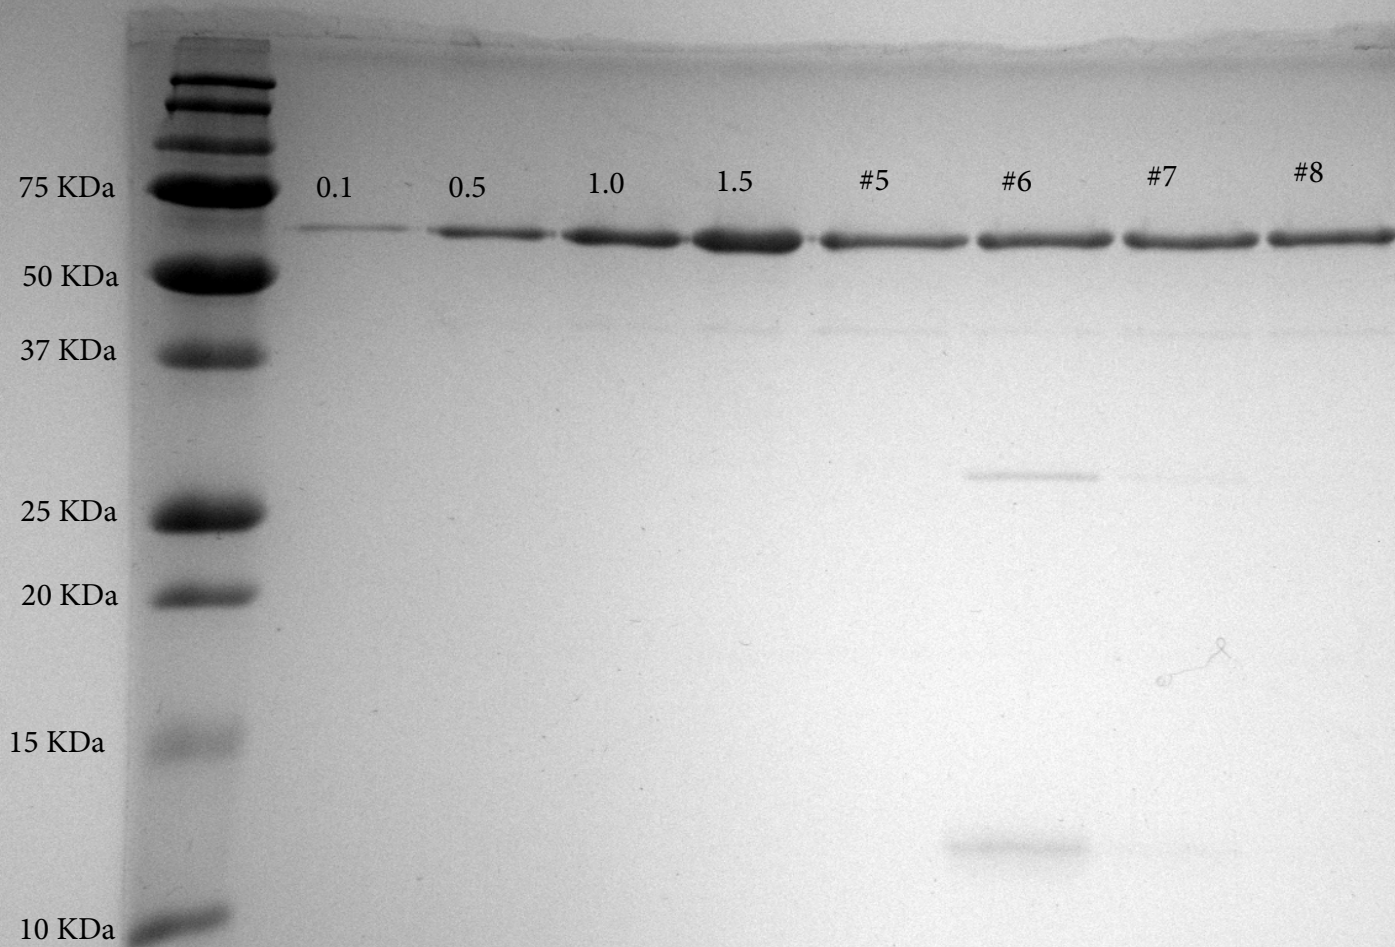

Dose verification  
CfaEB  
Gel 3

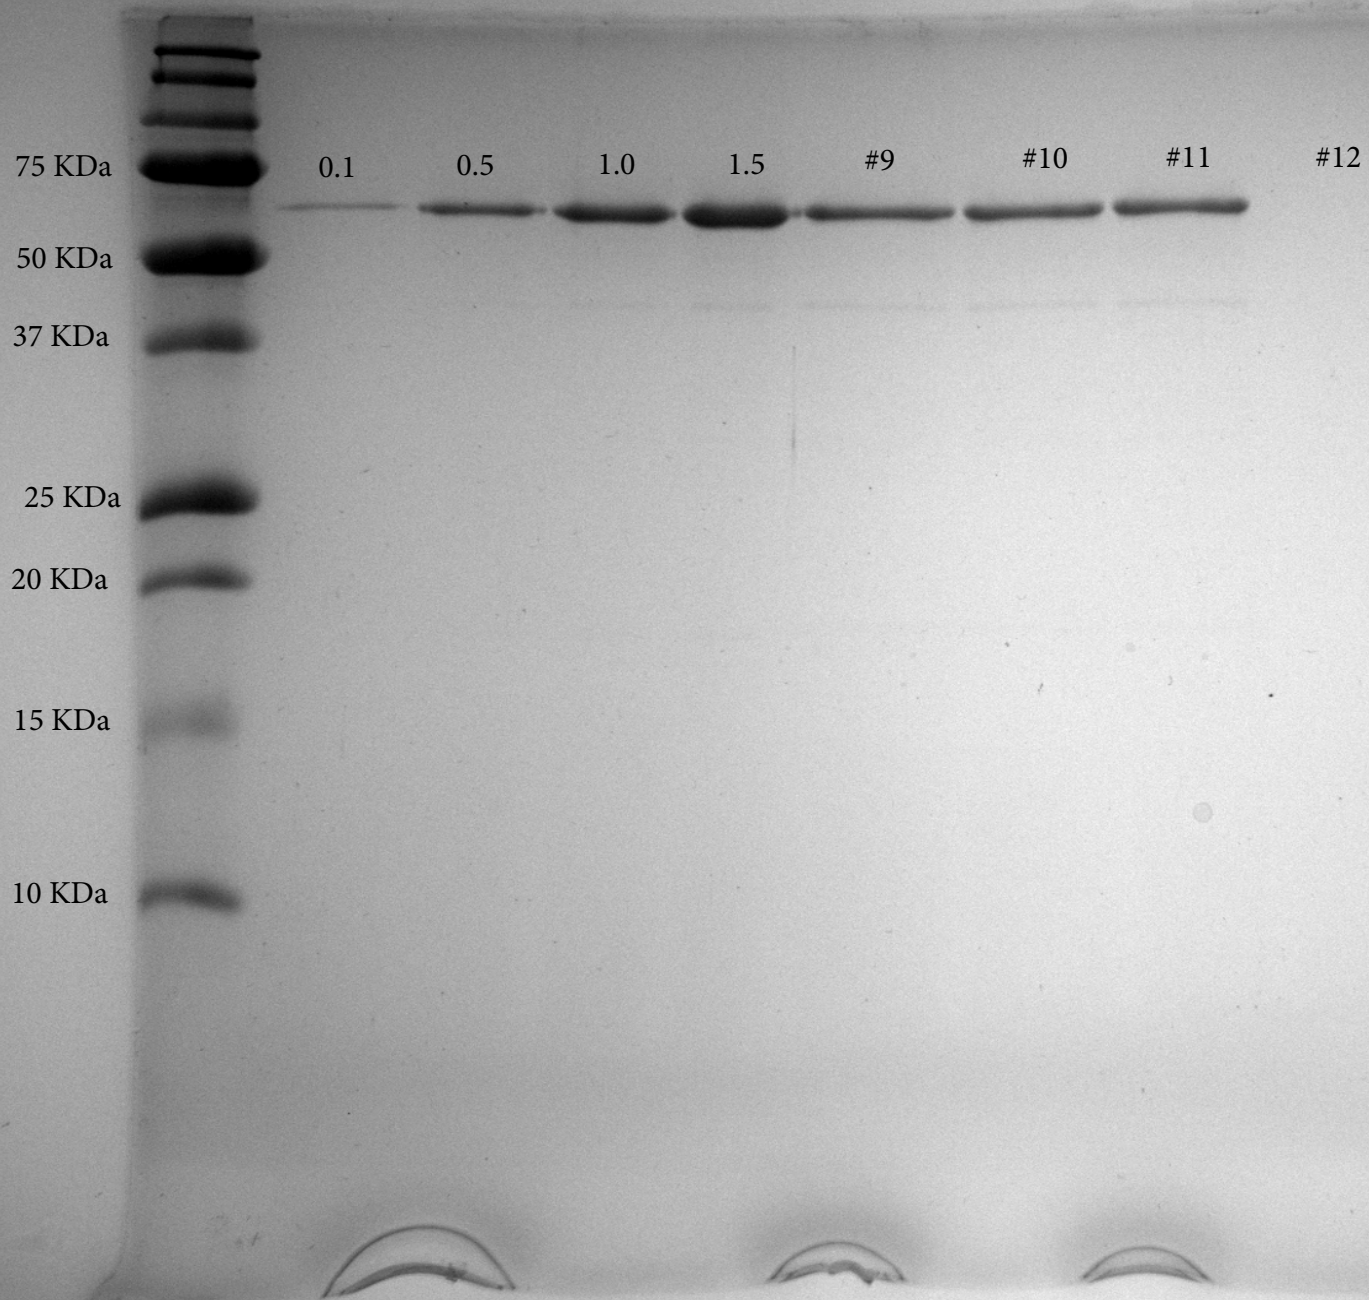

Supplement: pone.0224073.s005.pdf [file pone.0224073.s005.pdf]
